# Supplementary material for: The Effects of COVID-19 Pandemic on HIV Service Provision in Ukraine
Source: PubMed Central journal article supplement — J Int Assoc Provid AIDS Care. 2024 Sep 9;23:23259582241277649. doi: 10.1177/23259582241277649 (PMC11384520; doi:10.1177/23259582241277649), 2024-09-09
Supplement: sj-pdf-1-jia-10.1177_23259582241277649.pdf [file sj-pdf-1-jia-10.1177_23259582241277649.pdf]

## Supplement to “The effects of COVID-19 pandemic on HIV service provision in Ukraine”

**Table S1** HIV service provision indicators included in the analysis

**Table S2** HIV treatment cascade indicators in Ukraine, 2019-2021

**Table S3** Joinpoint regression model selection

**Figure S1** Monthly number of COVID-19 cases and COVID-19 deaths in Ukraine, 2020-2021

**Figure S2** Number of HIV tests and proportion of positive results in healthcare facilities, 2019-2021

**Figure S3** VL testing volume and percentage with VL below 1,000 copies/mL, 2019-2021

**Figure S4** Number of HIV tests conducted at community settings (all combined), by month, across all 4 joinpoints

**Figure S5** Proportion of HIV positive test results at community settings (all combined), 2 joinpoints

**Figure S6** Number of HIV tests at healthcare facilities, by quarter, 0 joinpoints

**Figure S7** Proportion of HIV positive test results at healthcare facilities, by quarter, 2 joinpoints

**Figure S8** Number of PLWH initiating ART, by month, 0 joinpoints

**Figure S9** Total number of PLWH on ART, by month, 6 joinpoints

**Figure S10** Number of VL tests, by quarter, 3 joinpoints

**Figure S11** Proportion of VL tests < 1,000 copies/mL, by quarter, 2 joinpoints

**Supplementary Table 1. HIV service provision indicators included in the analysis**

| <b>Indicator</b>                                         | <b>Calculation</b>                                                                                                           |
|----------------------------------------------------------|------------------------------------------------------------------------------------------------------------------------------|
| A. Number of HIV tests at NGOs                           | Sum of the number of HIV tests conducted at NGOs funded by three Principal Recipients of the GF and PEPFAR grants, by month  |
| B. Proportion of positive HIV tests at NGOs              | Number of positive HIV tests divided by the number of HIV tests conducted at NGOs, by month                                  |
| C. Number of HIV tests at health facilities              | Number of HIV tests conducted at public health facilities, by quarter                                                        |
| D. Proportion of positive HIV tests at health facilities | Number of positive HIV tests divided by the number of HIV tests conducted at health facilities, by month                     |
| E. Number of PLWH initiating ART                         | Number of PLWH newly initiating ART at health facilities by month                                                            |
| F. Total number of PLWH on ART                           | Total number of PLWH on ART at health facilities at the end of each month                                                    |
| G. Number of HIV-1 viral load (VL) tests                 | Number of VL tests performed at health facilities by quarter                                                                 |
| H. Proportion of VL tests <1,000 copies/mL               | Number of VL tests with <1000 copies/mL result, divided by the number of VL tests performed at health facilities, by quarter |

GF, the Global Fund to Fight AIDS, Tuberculosis, and Malaria; NGOs, non-governmental organizations; PEPFAR, the United States President's Emergency Plan for AIDS Relief; PLWH, people living with HIV; VL, HIV-1 viral load

**Supplementary Table 2. HIV treatment cascade indicators in Ukraine, 2019-2021**

| Year | Quarter | Month | Number of HIV tests at NGO (all combined) | Proportion of HIV positive tests at NGO | Number of HIV tests at health facilities | Proportion of HIV positive tests at health facilities | Number of PLWH initiating ART | Total number of PLWH on ART | Number of VL tests | Proportion of VL load tests <1,000 copies/mL | Approximate proportion of PLWH on ART covered by VL testing |
|------|---------|-------|-------------------------------------------|-----------------------------------------|------------------------------------------|-------------------------------------------------------|-------------------------------|-----------------------------|--------------------|----------------------------------------------|-------------------------------------------------------------|
| 2019 | 1       | 1     | 40,793                                    | 2.5%                                    |                                          |                                                       | 1,662                         | 102,745                     |                    |                                              |                                                             |
|      |         | 2     | 49,458                                    | 2.1%                                    |                                          |                                                       | 1,804                         | 103,928                     |                    |                                              |                                                             |
|      |         | 3     | 49,461                                    | 2.2%                                    | 664,907                                  | 0.9%                                                  | 1,778                         | 104,841                     | 72,116             | 94.0%                                        | 68.8%                                                       |
|      | 2       | 4     | 56,159                                    | 1.9%                                    |                                          |                                                       | 1,785                         | 105,819                     |                    |                                              |                                                             |
|      |         | 5     | 56,300                                    | 2.0%                                    |                                          |                                                       | 1,644                         | 106,409                     |                    |                                              |                                                             |
|      |         | 6     | 47,158                                    | 1.7%                                    | 608,227                                  | 0.9%                                                  | 1,547                         | 107,197                     | 78,155             | 94.2%                                        | 72.9%                                                       |
|      | 3       | 7     | 52,835                                    | 2.0%                                    |                                          |                                                       | 1,872                         | 107,837                     |                    |                                              |                                                             |
|      |         | 8     | 54,308                                    | 1.7%                                    |                                          |                                                       | 1,612                         | 108,945                     |                    |                                              |                                                             |
|      |         | 9     | 49,344                                    | 1.5%                                    | 598,391                                  | 0.7%                                                  | 1,645                         | 109,759                     | 82,108             | 94.6%                                        | 74.8%                                                       |
|      | 4       | 10    | 50,590                                    | 1.8%                                    |                                          |                                                       | 1,793                         | 110,293                     |                    |                                              |                                                             |
|      |         | 11    | 57,085                                    | 1.5%                                    |                                          |                                                       | 1,800                         | 111,687                     |                    |                                              |                                                             |
|      |         | 12    | 55,659                                    | 1.3%                                    | 657,819                                  | 0.9%                                                  | 1,822                         | 113,046                     | 85,670             | 94.7%                                        | 75.8%                                                       |
| 2020 | 1       | 1     | 40,617                                    | 2.1%                                    |                                          |                                                       | 1,594                         | 113,962                     |                    |                                              |                                                             |
|      |         | 2     | 35,682                                    | 2.2%                                    |                                          |                                                       | 1,760                         | 115,300                     |                    |                                              |                                                             |
|      |         | 3     | 27,008                                    | 2.6%                                    | 574,687                                  | 1.0%                                                  | 1,628                         | 116,381                     | 84,877             | 94.8%                                        | 72.9%                                                       |
|      | 2       | 4     | 54,277                                    | 1.2%                                    |                                          |                                                       | 1,351                         | 116,757                     |                    |                                              |                                                             |
|      |         | 5     | 70,705                                    | 1.0%                                    |                                          |                                                       | 1,313                         | 117,541                     |                    |                                              |                                                             |
|      |         | 6     | 87,010                                    | 1.0%                                    | 406,890                                  | 1.0%                                                  | 1,610                         | 118,499                     | 81,972             | 94.8%                                        | 69.2%                                                       |
|      | 3       | 7     | 84,447                                    | 1.1%                                    |                                          |                                                       | 1,687                         | 119,718                     |                    |                                              |                                                             |
|      |         | 8     | 78,434                                    | 0.9%                                    |                                          |                                                       | 1,506                         | 119,958                     |                    |                                              |                                                             |
|      |         | 9     | 80,893                                    | 0.9%                                    | 505,350                                  | 1.2%                                                  | 1,752                         | 120,983                     | 82,856             | 94.7%                                        | 68.5%                                                       |
|      | 4       | 10    | 77,856                                    | 0.7%                                    |                                          |                                                       | 1,268                         | 121,089                     |                    |                                              |                                                             |
|      |         | 11    | 78,962                                    | 0.7%                                    |                                          |                                                       | 1,309                         | 121,569                     |                    |                                              |                                                             |
|      |         | 12    | 100,036                                   | 1.3%                                    | 473,842                                  | 1.2%                                                  | 1,304                         | 121,949                     | 86,836             | 94.8%                                        | 71.2%                                                       |

**Supplementary Table 2. HIV treatment cascade indicators in Ukraine, 2019-2021 (cont.).**

| Year | Quarter | Month | Number of HIV tests at NGO (all combined) | Proportion of HIV positive tests at NGO | Number of HIV tests at health facilities | Proportion of HIV positive tests at health facilities | Number of PLWH initiating ART | Total number of PLWH on ART | Number of viral load tests | Proportion of VL tests <1,000 copies/mL | Approximate proportion of PLWH on ART covered by VL testing |
|------|---------|-------|-------------------------------------------|-----------------------------------------|------------------------------------------|-------------------------------------------------------|-------------------------------|-----------------------------|----------------------------|-----------------------------------------|-------------------------------------------------------------|
| 2021 | 1       | 1     | 54,482                                    | 2.3%                                    |                                          |                                                       | 1,150                         | 122,271                     |                            |                                         |                                                             |
|      |         | 2     | 60,758                                    | 2.5%                                    |                                          |                                                       | 1,483                         | 123,025                     |                            |                                         |                                                             |
|      |         | 3     | 49,595                                    | 3.4%                                    | 507,738                                  | 1.0%                                                  | 1,511                         | 123,799                     | 92,134                     | 95.1%                                   | 74.4%                                                       |
|      | 2       | 4     | 88,547                                    | 1.8%                                    |                                          |                                                       | 1,498                         | 125,056                     |                            |                                         |                                                             |
|      |         | 5     | 81,266                                    | 1.8%                                    |                                          |                                                       | 1,361                         | 125,722                     |                            |                                         |                                                             |
|      |         | 6     | 85,135                                    | 1.8%                                    | 468,145                                  | 1.0%                                                  | 1,472                         | 126,527                     | 97,176                     | 95.2%                                   | 76.8%                                                       |
|      | 3       | 7     | 86,373                                    | 1.9%                                    |                                          |                                                       | 1,609                         | 127,403                     |                            |                                         |                                                             |
|      |         | 8     | 83,324                                    | 1.8%                                    |                                          |                                                       | 1,416                         | 128,405                     |                            |                                         |                                                             |
|      |         | 9     | 92,012                                    | 1.7%                                    | 460,172                                  | 1.0%                                                  | 1,395                         | 129,022                     | 93,981                     | 95.6%                                   | 72.8%                                                       |
|      | 4       | 10    | 95,459                                    | 1.4%                                    |                                          |                                                       | 1,100                         | 129,370                     |                            |                                         |                                                             |
|      |         | 11    | 102,319                                   | 1.4%                                    |                                          |                                                       | 1,256                         | 129,938                     |                            |                                         |                                                             |
|      |         | 12    | 77,690                                    | 1.8%                                    | 487,413                                  | 0.9%                                                  | 1,226                         | 130,219                     | 91,243                     | 95.9%                                   | 70.1%                                                       |

ART, antiretroviral therapy; NGOs, non-governmental organizations; PLWH, people living with HIV; VL, HIV-1 viral load

**Supplementary Table 3. Joinpoint regression model selection**

| Model                                                        | # Joinpoints | # Observations | # Parameters | D. F. | BIC   | BIC3  | Weight | WBIC  | Selected model |
|--------------------------------------------------------------|--------------|----------------|--------------|-------|-------|-------|--------|-------|----------------|
| <b>Number of HIV tests at NGO (all combined) by month</b>    |              |                |              |       |       |       |        |       |                |
| 1                                                            | 0            | 36             | 2            | 34    | -2.76 | -2.76 | 0.00   | -2.76 |                |
| 2                                                            | 1            | 36             | 4            | 32    | -2.62 | -2.52 | 0.06   | -2.62 |                |
| 3                                                            | 2            | 36             | 6            | 30    | -2.87 | -2.67 | 0.54   | -2.76 |                |
| 4                                                            | 3            | 36             | 8            | 28    | -2.96 | -2.66 | 0.84   | -2.71 |                |
| 5                                                            | 4            | 36             | 10           | 26    | -3.13 | -2.74 | 0.84   | -2.80 | *              |
| 6                                                            | 5            | 36             | 12           | 24    | -3.10 | -2.60 | 0.84   | -2.68 |                |
| 7                                                            | 6            | 36             | 14           | 22    | -2.97 | -2.37 | 0.84   | -2.47 |                |
| <b>Proportion of HIV positive tests at NGO</b>               |              |                |              |       |       |       |        |       |                |
| 1                                                            | 0            | 36             | 2            | 34    | -1.85 | -1.85 | 0.00   | -1.85 |                |
| 2                                                            | 1            | 36             | 4            | 32    | -1.97 | -1.87 | 0.28   | -1.94 |                |
| 3                                                            | 2            | 36             | 6            | 30    | -2.55 | -2.35 | 0.59   | -2.43 | *              |
| 4                                                            | 3            | 36             | 8            | 28    | -2.63 | -2.33 | 0.90   | -2.36 |                |
| 5                                                            | 4            | 36             | 10           | 26    | -2.61 | -2.21 | 0.77   | -2.30 |                |
| 6                                                            | 5            | 36             | 12           | 24    | -2.68 | -2.19 | 0.88   | -2.24 |                |
| 7                                                            | 6            | 36             | 14           | 22    | -2.68 | -2.08 | 0.88   | -2.15 |                |
| <b>Number of HIV tests at health facilities by quarter</b>   |              |                |              |       |       |       |        |       |                |
| 1                                                            | 0            | 12             | 2            | 10    | -4.23 | -4.23 | 0.00   | -4.23 | *              |
| 2                                                            | 1            | 12             | 4            | 8     | -4.19 | -3.98 | 0.31   | -4.12 |                |
| 3                                                            | 2            | 12             | 6            | 6     | -3.96 | -3.54 | 0.72   | -3.66 |                |
| 4                                                            | 3            | 12             | 8            | 4     | -3.58 | -2.95 | 0.81   | -3.07 |                |
| <b>Proportion of HIV positive tests at health facilities</b> |              |                |              |       |       |       |        |       |                |
| 1                                                            | 0            | 12             | 2            | 10    | -4.00 | -4.00 | 0.00   | -4.00 |                |
| 2                                                            | 1            | 12             | 4            | 8     | -4.08 | -3.87 | 0.39   | -4.00 |                |
| 3                                                            | 2            | 12             | 6            | 6     | -4.72 | -4.30 | 0.77   | -4.40 | *              |
| 4                                                            | 3            | 12             | 8            | 4     | -4.32 | -3.70 | 0.78   | -3.84 |                |

**Supplementary Table 3. Joinpoint regression model selection (cont.)**

| Model                                             | # Joinpoints | # Observations | # Parameters | D.F. | BIC    | BIC3   | Weight | WBIC   | Selected model |
|---------------------------------------------------|--------------|----------------|--------------|------|--------|--------|--------|--------|----------------|
| <b>Number of PLWH initiating ART by month</b>     |              |                |              |      |        |        |        |        |                |
| 1                                                 | 0            | 36             | 2            | 34   | -4.45  | -4.45  | 0.00   | -4.45  | *              |
| 2                                                 | 1            | 36             | 4            | 32   | -4.30  | -4.20  | 0.05   | -4.30  |                |
| 3                                                 | 2            | 36             | 6            | 30   | -4.24  | -4.04  | 0.30   | -4.18  |                |
| 4                                                 | 3            | 36             | 8            | 28   | -4.20  | -3.90  | 0.52   | -4.05  |                |
| 5                                                 | 4            | 36             | 10           | 26   | -4.10  | -3.70  | 0.61   | -3.86  |                |
| 6                                                 | 5            | 36             | 12           | 24   | -4.07  | -3.57  | 0.58   | -3.78  |                |
| 7                                                 | 6            | 36             | 14           | 22   | -3.99  | -3.39  | 0.61   | -3.62  |                |
| <b>Total number of PLWH on ART by month</b>       |              |                |              |      |        |        |        |        |                |
| 1                                                 | 0            | 36             | 2            | 34   | -9.33  | -9.33  | 0.00   | -9.33  |                |
| 2                                                 | 1            | 36             | 4            | 32   | -11.14 | -11.04 | 0.87   | -11.05 |                |
| 3                                                 | 2            | 36             | 6            | 30   | -11.28 | -11.08 | 0.85   | -11.11 |                |
| 4                                                 | 3            | 36             | 8            | 28   | -11.49 | -11.19 | 0.88   | -11.23 |                |
| 5                                                 | 4            | 36             | 10           | 26   | -11.42 | -11.02 | 0.89   | -11.07 |                |
| 6                                                 | 5            | 36             | 12           | 24   | -12.00 | -11.50 | 0.91   | -11.55 |                |
| 7                                                 | 6            | 36             | 14           | 22   | -12.14 | -11.54 | 0.91   | -11.59 | *              |
| <b>Number of VL tests by quarter</b>              |              |                |              |      |        |        |        |        |                |
| 1                                                 | 0            | 12             | 2            | 10   | -6.17  | -6.17  | 0.00   | -6.17  |                |
| 2                                                 | 1            | 12             | 4            | 8    | -6.10  | -5.89  | 0.29   | -6.04  |                |
| 3                                                 | 2            | 12             | 6            | 6    | -5.91  | -5.49  | 0.81   | -5.58  |                |
| 4                                                 | 3            | 12             | 8            | 4    | -7.95  | -7.33  | 1.00   | -7.33  | *              |
| <b>Proportion of VL tests &lt;1,000 copies/mL</b> |              |                |              |      |        |        |        |        |                |
| 1                                                 | 0            | 12             | 2            | 10   | -12.23 | -12.23 | 0.00   | -12.23 |                |
| 2                                                 | 1            | 12             | 4            | 8    | -12.52 | -12.31 | 0.51   | -12.42 |                |
| 3                                                 | 2            | 12             | 6            | 6    | -14.01 | -13.59 | 0.97   | -13.61 | *              |
| 4                                                 | 3            | 12             | 8            | 4    | -13.22 | -12.60 | 0.85   | -12.70 |                |

Abbreviations: D.F., degrees of freedom; BIC, Bayesian Information Criterion; WBIC, Weightned Bayesian Information Criterion; NGOs, non-governmental organizations; PLWH, people living with HIV; VL, HIV-1 viral load; WBIC is calculated as  $((1 - \text{Weight}) * \text{BIC} + (\text{BIC3} * \text{Weight}))$ . Weight not applicable for the 0 joinpoint model

**Supplementary Figure 1** Monthly number of COVID-19 cases and COVID-19 deaths in Ukraine, 2020-2021

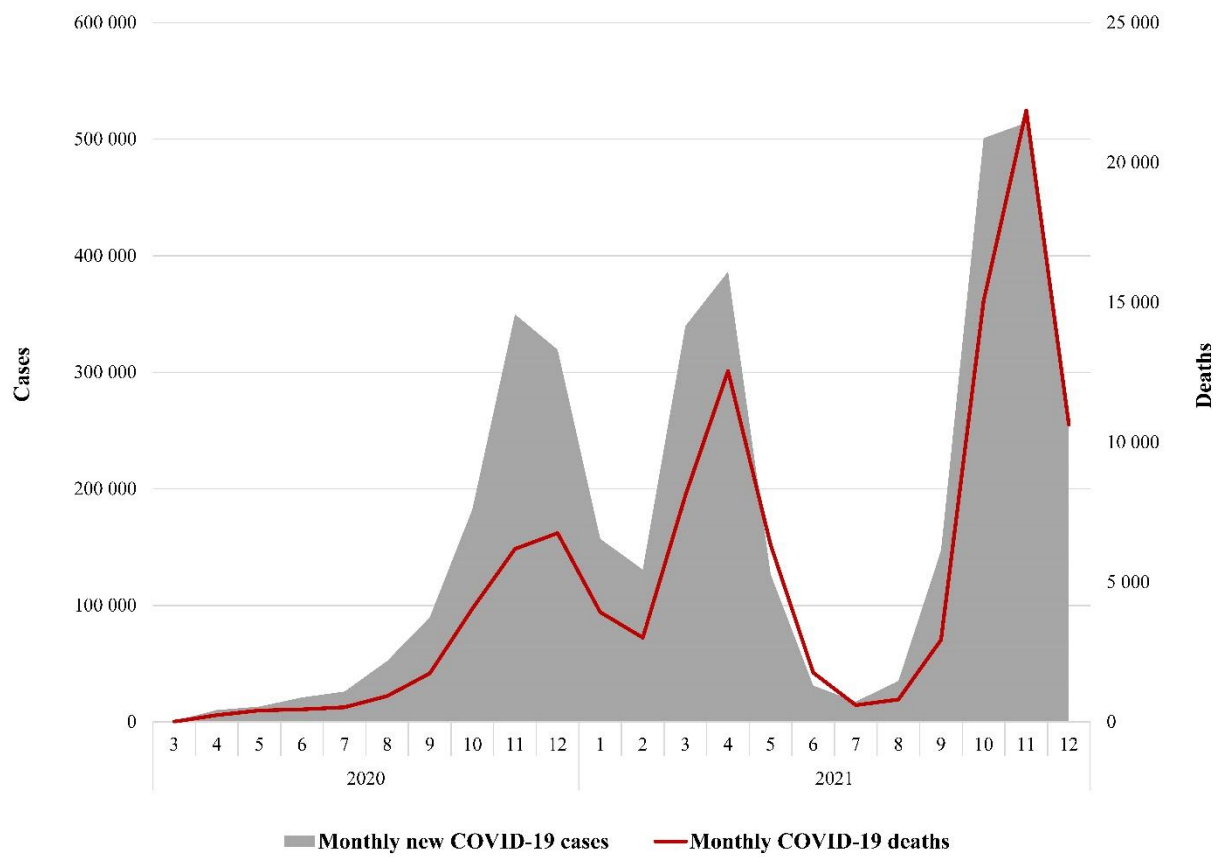

**Supplementary Figure 2** Number of HIV tests and proportion of positive results in healthcare facilities, 2019-2021

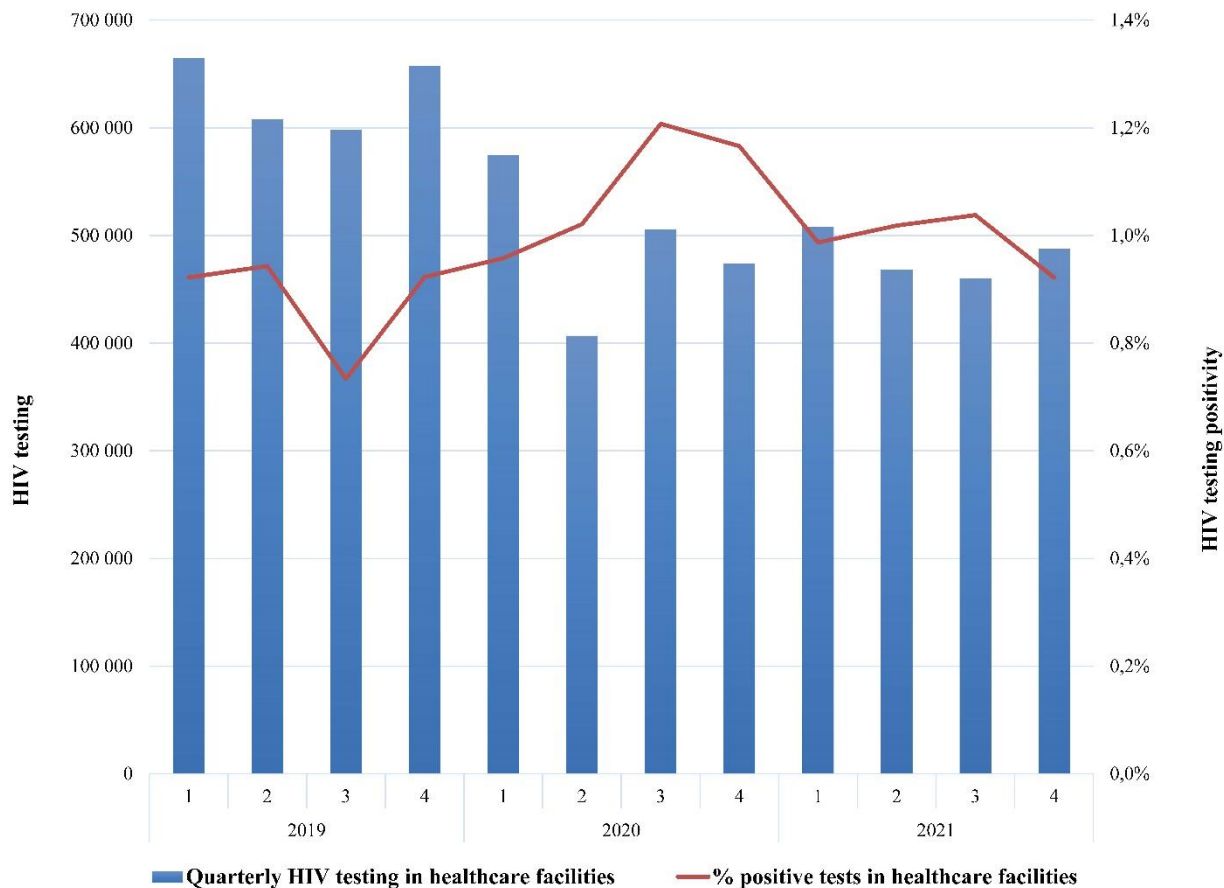



**Supplementary Figure 3** VL testing volume and percentage with VL below 1,000 copies/mL, 2019-2021

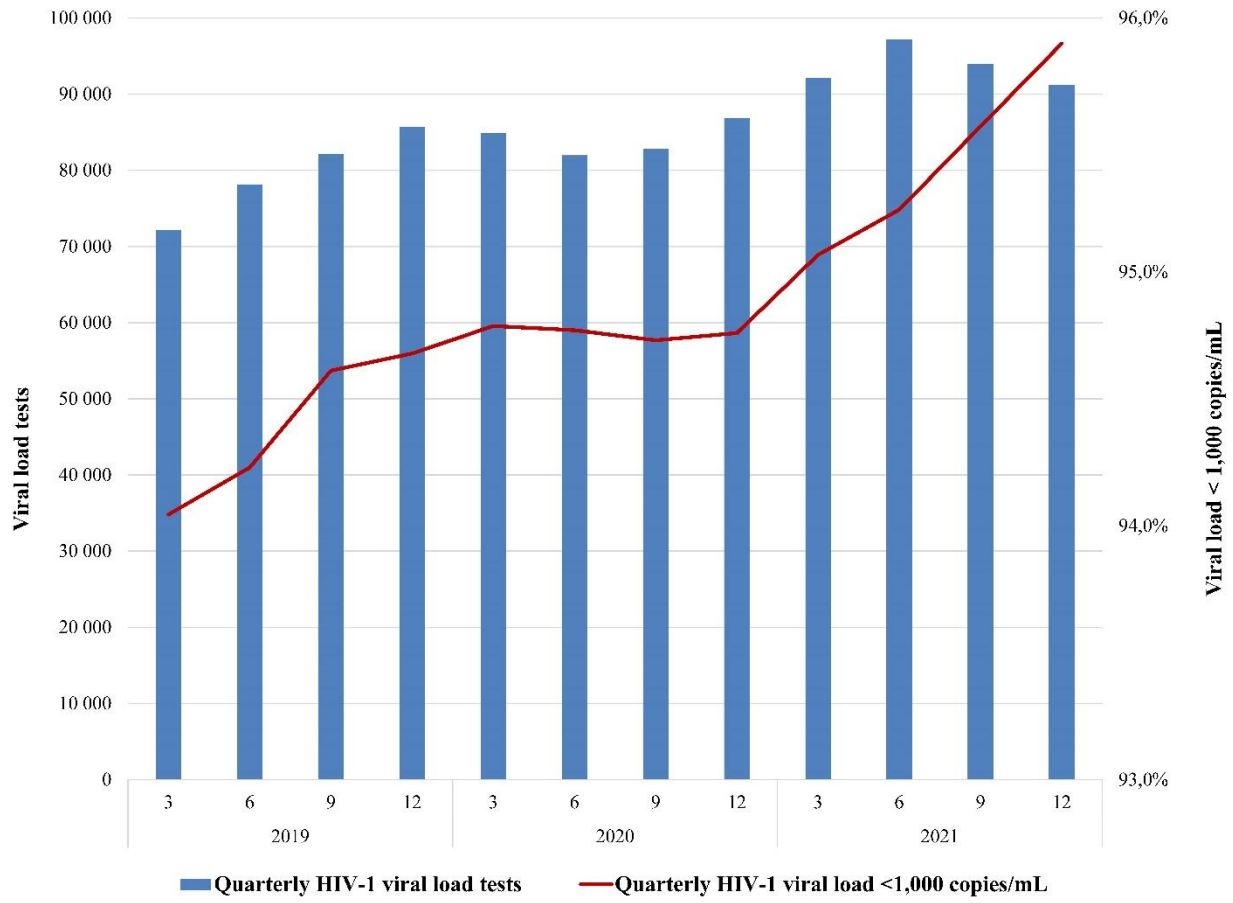

**Supplementary Figure 4. Number of HIV tests conducted at community settings (all combined), by month, across all 4 joinpoints**

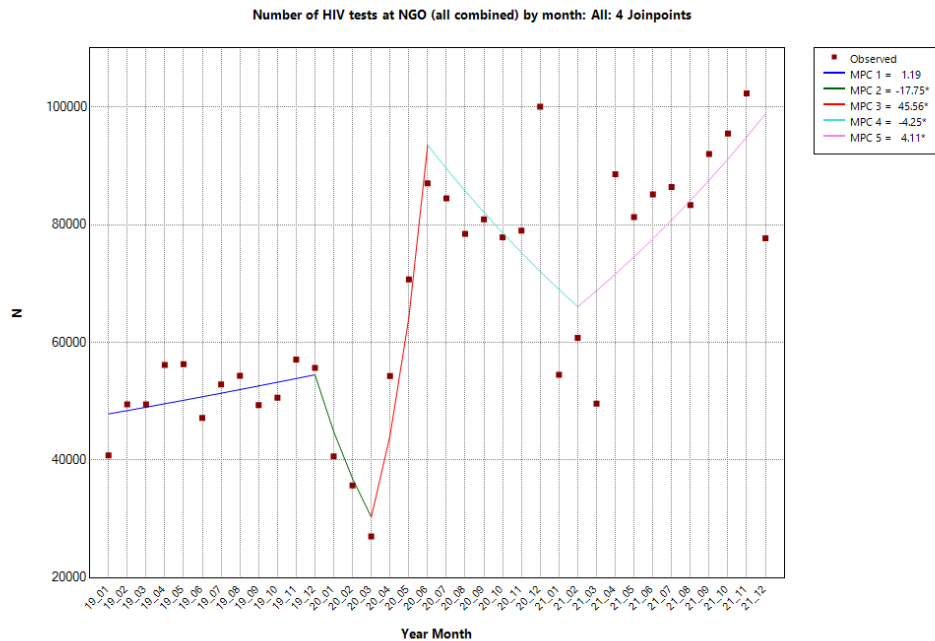

\* Indicates that the Monthly Percent Change (MPC) is significantly different from zero at the alpha = 0.05 level.  
 -- Test Statistic and P-Value not available for the Empirical Quantile method.  
 Final Selected Model: 4 Joinpoints.

**Supplementary Figure 5. Proportion of HIV positive test results at community settings (all combined), 2 joinpoints**

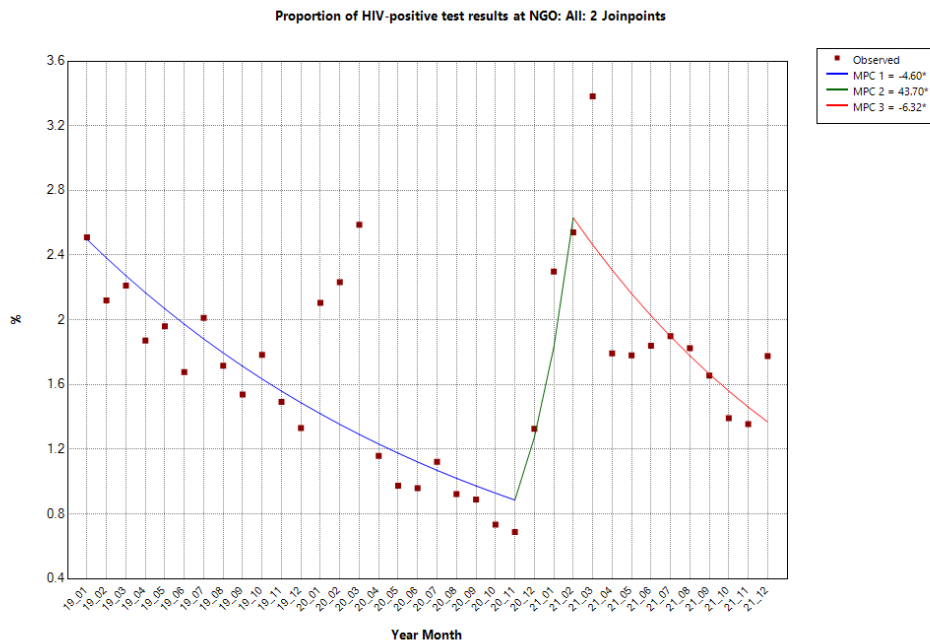

\* Indicates that the Monthly Percent Change (MPC) is significantly different from zero at the alpha = 0.05 level.  
 -- Test Statistic and P-Value not available for the Empirical Quantile method.  
 Final Selected Model: 2 Joinpoints.

## Supplementary Figure 6. Number of HIV tests at healthcare facilities, by quarter, 0 joinpoints

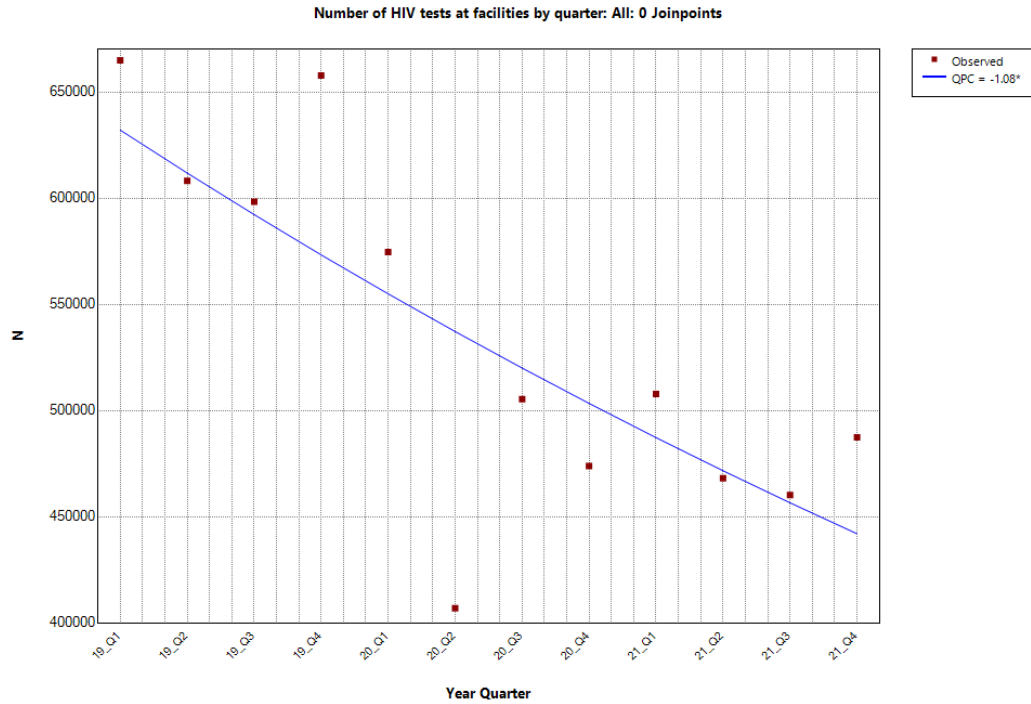

\* Indicates that the Quarterly Percent Change (QPC) is significantly different from zero at the alpha = 0.05 level.  
 -- Test Statistic and P-Value not available for the Empirical Quantile method.  
 Final Selected Model: 0 Joinpoints.

## Supplementary Figure 7. Proportion of HIV positive test results at healthcare facilities, by quarter, 2 joinpoints

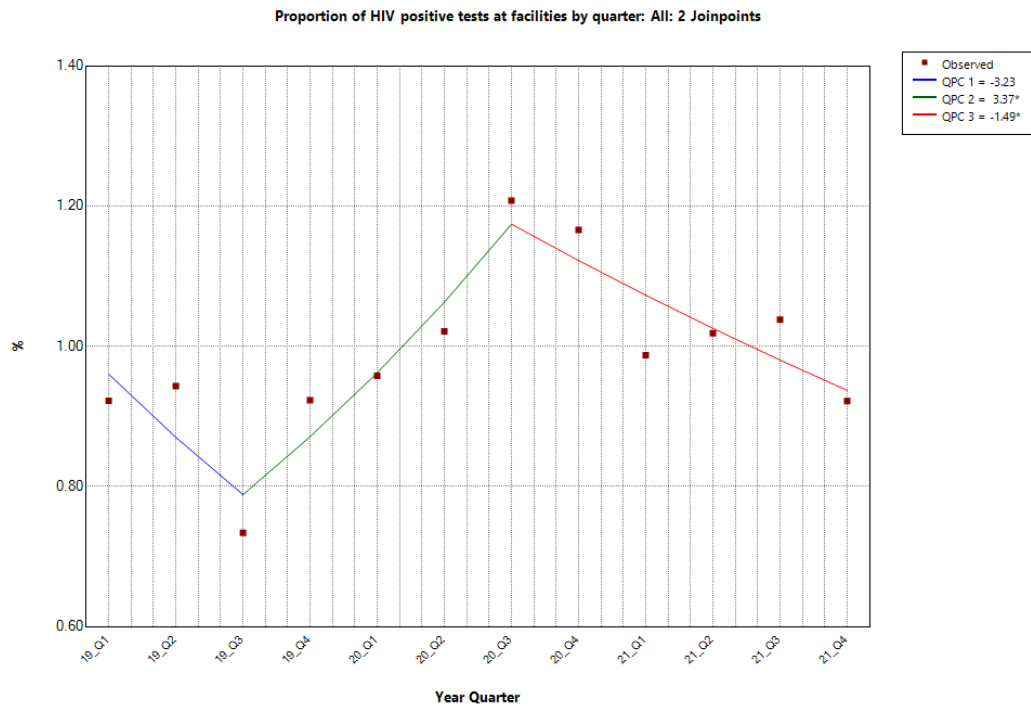

\* Indicates that the Quarterly Percent Change (QPC) is significantly different from zero at the alpha = 0.05 level.  
 -- Test Statistic and P-Value not available for the Empirical Quantile method.  
 Final Selected Model: 2 Joinpoints.

### Supplementary Figure 8. Number of PLWH initiating ART, by month, 0 joinpoints

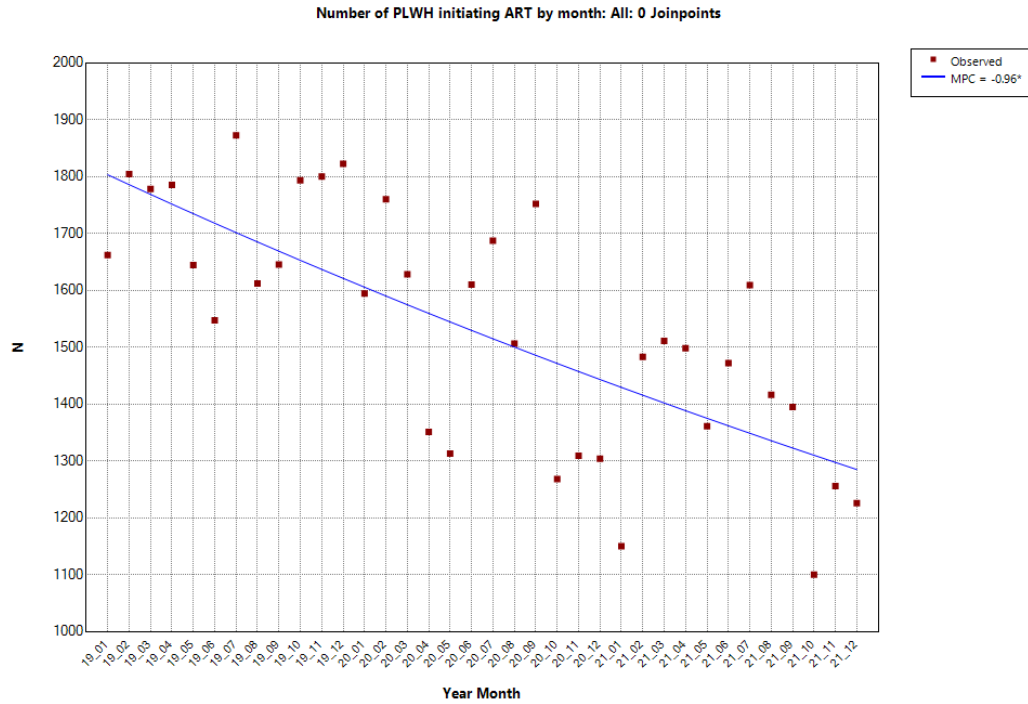

\* Indicates that the Monthly Percent Change (MPC) is significantly different from zero at the alpha = 0.05 level.  
 -- Test Statistic and P-Value not available for the Empirical Quantile method.  
 Final Selected Model: 0 Joinpoints.

### Supplementary Figure 9. Total number of PLWH on ART, by month, 6 joinpoints

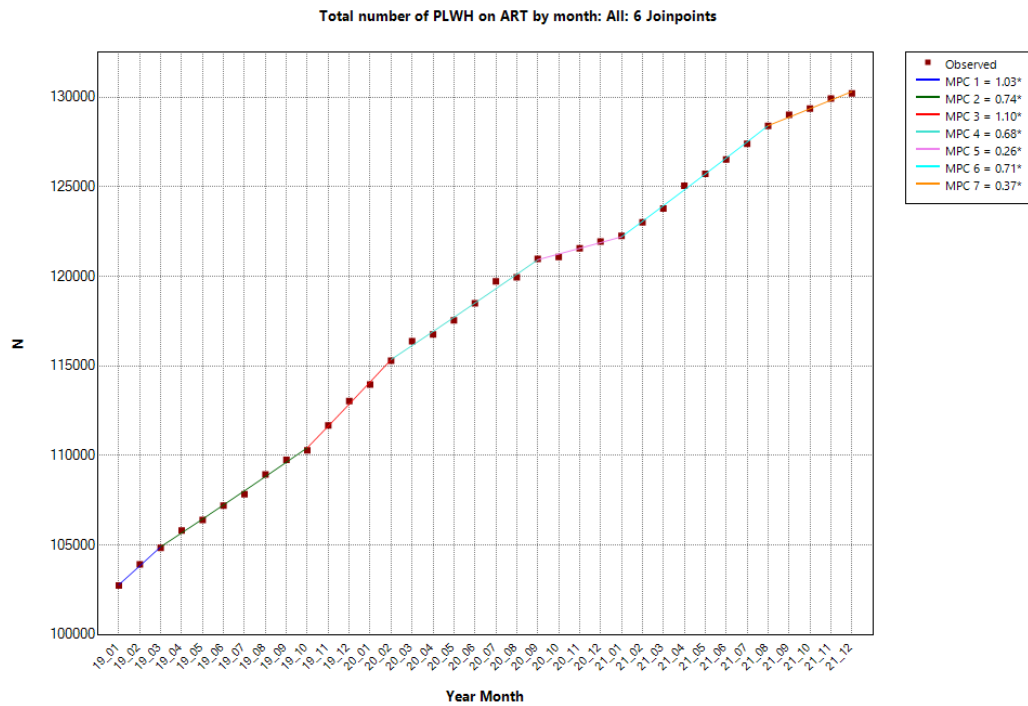

\* Indicates that the Monthly Percent Change (MPC) is significantly different from zero at the alpha = 0.05 level.  
 -- Test Statistic and P-Value not available for the Empirical Quantile method.  
 Final Selected Model: 6 Joinpoints.

### Supplementary Figure 10. Number of VL tests, by quarter, 3 joinpoints

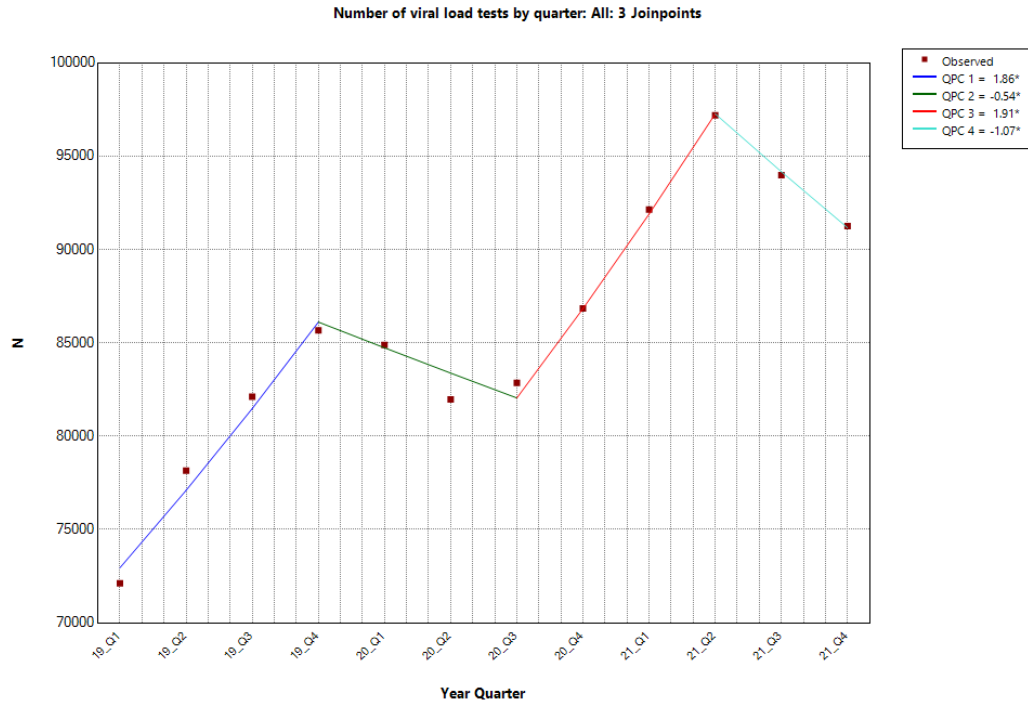

\* Indicates that the Quarterly Percent Change (QPC) is significantly different from zero at the alpha = 0.05 level.  
 -- Test Statistic and P-Value not available for the Empirical Quantile method.  
 Final Selected Model: 3 Joinpoints.

### Supplementary Figure 11. Proportion of VL tests < 1,000 copies/mL, by quarter, 2 joinpoints

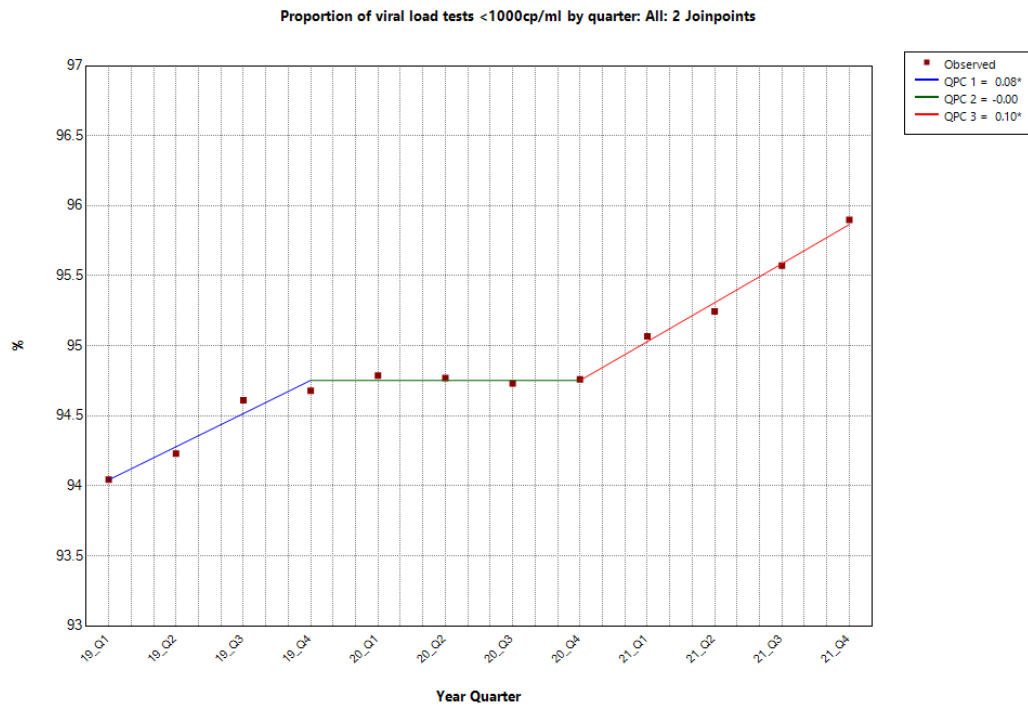

\* Indicates that the Quarterly Percent Change (QPC) is significantly different from zero at the alpha = 0.05 level.  
 -- Test Statistic and P-Value not available for the Empirical Quantile method.  
 Final Selected Model: 2 Joinpoints.
